# Supplementary material
Source: HighWire-hosted journal article supplement (https://erj.ersjournals.com/content/55/6/1902335)
Supplement: inline-supplementary-material-1 [file inline-supplementary-material-1.pdf]

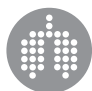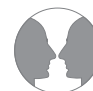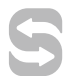

SHAREABLE PDF

# Maternal iron supplementation in pregnancy and asthma in the offspring: follow-up of a randomised trial in Finland

Seif O. Shaheen<sup>1</sup>, Mika Gissler<sup>2,3</sup>, Graham Devereux<sup>4</sup>, Maijaliisa Erkkola<sup>5</sup>, Tarja I. Kinnunen<sup>6</sup>, Harry Mcardle<sup>7</sup>, Aziz Sheikh<sup>8</sup>, Elina Hemminki<sup>2</sup> and Bright I. Nwaru<sup>6,8,9,10</sup>

**Affiliations:** <sup>1</sup>Institute of Population Health Sciences, Barts and The London School of Medicine and Dentistry, Queen Mary University of London, London, UK. <sup>2</sup>Finnish Institute for Health and Welfare, Helsinki, Finland. <sup>3</sup>Dept of Neurobiology, Care Sciences and Society, Karolinska Institute, Stockholm, Sweden. <sup>4</sup>Liverpool School of Tropical Medicine, Liverpool, UK. <sup>5</sup>Dept of Food and Nutrition, University of Helsinki, Helsinki, Finland. <sup>6</sup>Unit of Health Sciences, Faculty of Social Sciences, Tampere University, Tampere, Finland. <sup>7</sup>Rowett Institute of Nutrition and Health, University of Aberdeen, Aberdeen, UK. <sup>8</sup>Asthma UK Centre for Applied Research, Usher Institute, University of Edinburgh, Edinburgh, UK. <sup>9</sup>Krefting Research Centre, Institute of Medicine, University of Gothenburg, Gothenburg, Sweden. <sup>10</sup>Wallenberg Centre for Molecular and Translational Medicine, University of Gothenburg, Sweden.

**Correspondence:** Seif O. Shaheen, Institute of Population Health Sciences, Barts and The London School of Medicine and Dentistry, 58 Turner Street, London E1 2AB, UK. E-mail: s.shaheen@qmul.ac.uk

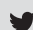

@ERSpublications

**Iron supplementation in pregnancy may reduce the risk of asthma in the offspring** <http://bit.ly/2UHMfid>

**Cite this article as:** Shaheen SO, Gissler M, Devereux G, *et al.* Maternal iron supplementation in pregnancy and asthma in the offspring: follow-up of a randomised trial in Finland. *Eur Respir J* 2020; 55: 1902335 [https://doi.org/10.1183/13993003.02335-2019].

This single-page version can be shared freely online.

## To the Editor:

Evidence for the hypothesis that prenatal nutrition may influence the risk of childhood respiratory and atopic disorders has strengthened in recent years. For example, randomised controlled trials (RCTs) have suggested that maternal supplementation with vitamin D or fish oil in pregnancy could prevent early childhood wheezing and asthma in the offspring [1, 2]. Another nutrient of interest is iron. Animal experiments have implicated iron in fetal airway development [3]. In two UK population-based birth cohorts, using different approaches, we have found evidence suggesting that lower maternal iron levels in pregnancy may increase the risk of wheezing, atopy and lower lung function in the offspring [4–7]. However, the possibility that unmeasured or residual confounding might explain these observational findings cannot be ruled out. A study in the USA reported that maternal anaemia was associated with an increased risk of childhood asthma in offspring of mothers with asthma, but not in those whose mothers did not have asthma [8], although we did not confirm such effect modification [5].
